# Supplementary material
Source: PubMed Central journal article supplement (PMC6741491)
Supplement: jin-0006-0205-s01.pdf [file jin-0006-0205-s01.pdf]

## Erratum

---

In the article by Merres et al., entitled 'Role of the cathelicidin-related antimicrobial peptide in inflammation and mortality in a mouse model of bacterial meningitis' [J Innate Immun 2014;6:205–218, DOI: 10.1159/000353645], the authors' contributions footnote should correctly read 'J.M. and J.H. contributed equally as first authors; S.C.T. and L.-O.B. contributed equally as senior authors'.
