# Supplementary material
Source: PubMed Central journal article supplement (PMC6741491)
Supplement: jin-0006-0205-s02.pdf [file jin-0006-0205-s02.pdf]

**A**

**WT non-infected vs. WT infected**

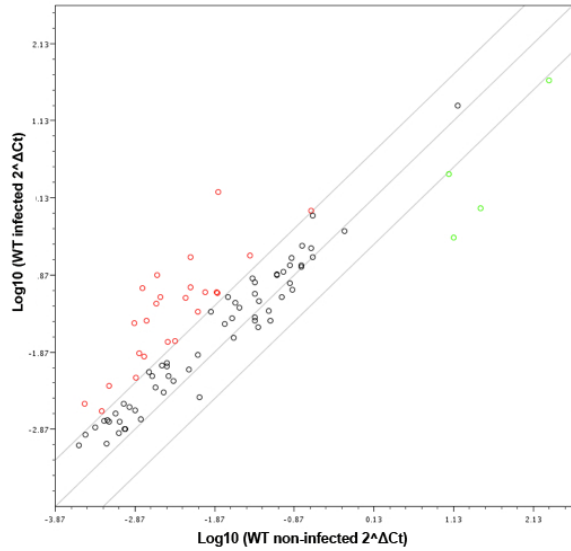

**B**

**CRAMP-KO non-infected vs.  
CRAMP-KO infected**

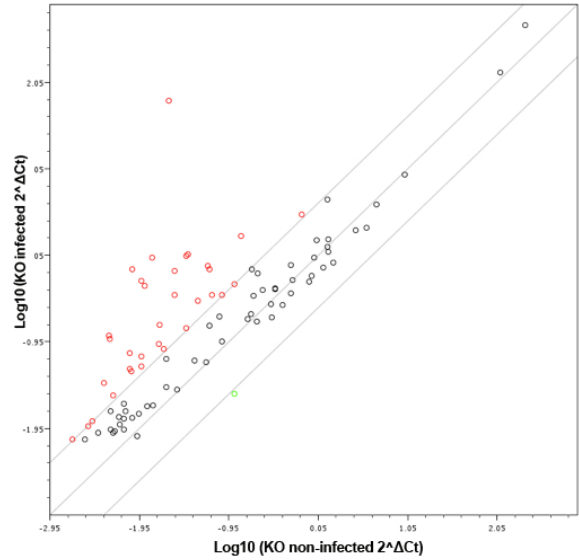

**Online Suppl. Fig. 1.** Scatter plot of general immune response after pneumococcal meningitis in the hippocampal formation. CRAMP-WT and CRAMP-deficient (KO) mice were infected with *Streptococcus pneumoniae*. Uninfected control animals were injected with 10  $\mu$ l of a sterile saline solution. After 36 h, the mRNA expression of different markers for innate and adaptive immune response was determined using mice PCR array. Data are presented as means of three mice per group. Red points – increased expression, green points – decreased expression and black points – no change of expression. For detailed results see Table 3.
